# Supplementary material for: Genetic Analysis for Mapping of Physiological Traits Related to Seed Vigour in Rice Through Association Mapping
Source: Research Square preprint supplement (doi:10.21203/rs.3.rs-288996/v1), 2021-03-16
Supplement: Supplementary file 1 [file 060ed2da6a22f807a018d828.xlsx]

## Sheet: Mean physiological trait
	supplementary Table 1. Mean values of 15 physiological traits estimated from theoriginal population containing 250 rice germplasm lines
Sl No.	Region	Accession no./Vernacular name	EC(µ mhos Cm-1	Rate of imbibition(ml hr-1)	Germination Index	Germination %	Root length(SL)	Shoot length(cm)	Seedling dry weight(g)	Seed Vigour index I	seed Vigour index II	Rate of root growth (Cm day-1 )	Rate of shoot growth (Cm day-1 )	Rate of plumule elongation(Cm day-1 )	RGR	AGR	MGR
1	Odisha	*Magura-s	34.3	0.006	1.478	33	5.38	7.08	0.005	411.18	0.165	0.632	1.38	0.48	0.241	1.857	0.181
2		Magura manji	41.23	0.00479167	3.83333	66	6.73	7.36	0.0045	929.94	0.297	0.483333	1.17333	0.52	0.0577979	1.65667	0.227784
3		Kalakanhu	65.234	0.005	2.251	60	4.52	4.235	0.004	525.3	0.24	0.245	1.245	0.24	0.062	0.785	0.232
4		*Magra	38	0.00529167	1.589	32	7.62	5.29	0.0041	413.12	0.1312	1.208	0.846	0.087	0.175	2.065	0.204
5		Jata	58.264	0.004	3.186	50	3.53	3.214	0.005	337.2	0.25	0.352	0.785	0.62	0.154	0.845	0.325
6		*Kathidhan	56	0.009	1.896	38	7.124	6.54	0.01	519.232	0.38	0.41	0.436	0.6	0.091	0.871	0.189
7		Gargarh	69.214	0.006	2.654	70	5.21	4.26	0.007	662.9	0.49	0.263	0.982	0.5	0.113	1.121	0.156
8		Jhuli	55.426	0.007	3.489	60	4.12	3.894	0.005	480.84	0.3	0.425	1.112	0.25	0.089	0.725	0.245
9		*Karpurkanti	29	0.005	3.685	65	4.18	5.13	0.00433333	605.15	0.281667	0.398	0.694	0.543	0.073	1.004	0.211
10		Rasuna	62.32	0.005	1.564	50	3.25	4.11	0.008	368	0.4	0.352	0.845	0.4	0.112	0.645	0.169
11		*Lal gundi	62.85	0.007	2.016	36	3.45	5.46	0.007	320.76	0.252	0.238	0.584	0.672	0.137	0.841	0.219
12		Latasal	71.52	0.004	1.892	60	4.56	3.24	0.005	468	0.3	0.289	0.781	0.55	0.071	1.105	0.258
13		Kasibaha	65.143	0.005	2.356	70	5.26	4.56	0.006	687.4	0.42	0.341	0.689	0.32	0.074	0.746	0.172
14		*Lata mahu	67	0.006	1.358	30	4.61	6.58	0.006	335.7	0.18	0.818	0.317	0.83	0.212	1.149	0.194
15		Rangi	51.324	0.006	4.632	55	4.32	5.62	0.005	546.7	0.275	0.257	0.941	0.42	0.087	0.658	0.241
16		Kalakadam	62.543	0.007	3.568	65	3.58	4.31	0.004	512.85	0.26	0.412	0.853	0.28	0.078	0.696	0.186
17		*Kantakaamala	52.75	0.0049375	3.483	70	4.256	6.21	0.008	732.62	0.56	0.635	0.41	0.69	0.085	1.114	0.213
18		Pankhi	58.321	0.005	1.258	70	4.52	4.89	0.005	658.7	0.35	0.384	0.912	0.34	0.112	0.721	0.211
19		*Kanak champa	35	0.007	1.085	26	5.58	0.84	0.0081	166.92	0.2106	0.721	0.448	0.326	0.301	1.107	0.182
20		Sodi	61.24	0.003	2.697	60	3.89	5.23	0.004	547.2	0.24	0.261	0.877	0.42	0.089	0.845	0.193
21		*Kunda dhan	61	0.006	0.852	25	4.869	5.642	0.005	262.775	0.125	0.151	0.764	0.41	0.238	0.928	0.165
22		Bhundi	71.651	0.005	2.436	40	4.31	4.35	0.006	346.4	0.24	0.321	0.763	0.51	0.187	0.984	0.218
23		*Landi	38	0.005	2.196	38	4.168	4.08	0.007	313.424	0.266	0.539	0.614	0.265	0.151	1.224	0.207
24		Daonra	48.65	0.006	1.154	45	4.12	3.85	0.005	358.65	0.225	0.328	0.985	0.485	0.115	1.112	0.214
25		*kapanthi	55.49	0.00535417	4.284	75	9.957	7.468	0.008	1306.88	0.6	0.669	1.463	0.54	0.071	2.17	0.219
26		Pasibutia	52.31	0.007	1.285	55	3.85	3.97	0.004	430.1	0.22	0.321	0.883	0.512	0.143	1.018	0.211
27		*Lata chaunri	61	0.005	3.416	66	5.17	4.69	0.00483333	650.76	0.319	0.415	0.246	0.48	0.196	0.658	0.218
28		Salkoiya	50.85	0.004	1.196	50	4.65	4.14	0.008	439.5	0.4	0.287	0.785	0.556	0.158	1.142	0.208
29		*Laxmi bilash	22	0.005	1.115	25	5.45	6.29	0.006	293.5	0.15	0.284	0.382	0.58	0.261	0.65	0.196154
30		Guntha	64.12	0.006	2.114	48	4.78	5.22	0.006	480	0.288	0.296	0.825	0.496	0.146	1.136	0.235
31		Malata	66.32	0.004	2.015	60	5.12	4.85	0.005	598.2	0.3	0.311	0.863	0.497	0.089	0.987	0.189
32		*Kanta kapura	52	0.00627083	4.015	72	5.23	7.37	0.0075	907.2	0.54	0.438	0.975	0.683	0.116	1.385	0.231
33		*Chinamal	47	0.00508333	2.35	48	7.36	6.26	0.008	653.76	0.384	0.572	0.528	0.37	0.186	1.015	0.208
34		Pindagadi	62.15	0.005	1.854	50	3.86	4.67	0.004	426.5	0.2	0.287	0.998	0.501	0.097	0.728	0.169
35		Baunsa gaja	59.12	0.004	1.789	60	4.65	5.29	0.005	596.4	0.3	0.327	0.946	0.463	0.102	0.984	0.173
36		*Gondia champeisiali	41.25	0.008	3.584	65	6.62	7.95	0.012	947.05	0.78	0.498	0.87	0.72	0.089	1.325	0.217
37		Palasphul	61.13	0.005	1.654	65	4.89	5.17	0.006	653.9	0.39	0.296	0.754	0.384	0.113	0.993	0.208
38		*Balisara lakti machi -k	53.17	0.006	2.267	41	7.46	6.987	0.005	592.327	0.205	1.178	0.968	0.48	0.136	2.08	0.231
39		Matia	47.65	0.006	2.235	45	4.32	4.96	0.004	417.6	0.18	0.319	0.789	0.402	0.109	1.112	0.211
40		Sarada	52.34	0.007	2.218	35	3.68	4.65	0.005	291.55	0.175	0.283	0.863	0.445	0.124	1.108	0.162
41		*Champaeisiali	52.12	0.006	3.268	60	9.35	7.16	0.007	990.6	0.42	1.007	0.936	0.75	0.11	2.058	0.231
42		Ladu	55.68	0.006	2.145	40	4.158	5.112	0.005	370.8	0.2	0.214	0.987	0.432	0.162	1.119	0.185
43		*Kaniar	38.7	0.00672917	3.8	66	5.46	8.42	0.00933333	916.08	0.616	0.406667	0.843333	0.56	0.0513116	1.25	0.225242
44		Madhabi	65.27	0.005	1.785	45	4.362	5.102	0.006	425.88	0.27	0.235	0.962	0.425	0.175	0.987	0.167
45	Manipur	AC9011	61.23	0.0112917	1.75	21.6667	7.74	7.978	0.019	340.557	0.411667	0.820884	1.27933	0.13	0.116495	2.10022	0.267943
46		*AC9050	34	0.006	1.753	35	4.523	2.496	0.014	245.665	0.49	0.213	0.254	0.248	0.148	0.469	0.258
47		AC9102	45.21	0.00689583	1.15	24	6.86	3.2	0.0265	241.44	0.636	0.736667	0.646667	0.31	0.293905	1.38333	0.230769
48		AC9119A	38.53	0.00529167	1.06667	24	4.05	3.34	0.0305	177.36	0.732	0.343333	0.31	0.32	0.227269	0.653333	0.214286
49		*AC9093	34	0.0061875	2.576	42	6.08	3.856	0.028	417.312	1.176	0.451	0.564	0.323	0.162	0.996	0.302
50		AC9008	58.26	0.004	1.152	45	5.63	4.52	0.025	456.75	1.125	0.365	0.658	0.318	0.112	0.854	0.245
51		AC9010	63.54	0.005	2.253	40	4.52	5.23	0.018	390	0.72	0.421	0.525	0.225	0.215	0.754	0.213
52		*AC9043	27	0.008	4.683	52	6.54	8.847	0.017	800.124	0.884	0.273	1.286	0.139	0.0225	1.536	0.313
53		AC9016	59.45	0.006	1.856	50	4.36	3.63	0.021	399.5	1.05	0.389	0.463	0.32	0.186	0.689	0.308
54		AC9019	72.58	0.005	2.321	40	4.897	4.58	0.019	379.08	0.76	0.356	0.786	0.25	0.245	1.154	0.256
55		*AC9044A	38.52	0.00625	3.758	40	7.956	9.011	0.016	678.68	0.64	1.215	0.986	0.085	0.268	2.285	0.28
56		AC9022	66.54	0.004	2.635	35	5.265	6.35	0.017	406.525	0.595	0.387	0.742	0.18	0.224	0.894	0.287
57		AC9023	70.25	0.003	3.215	40	3.45	4.89	0.011	333.6	0.44	0.426	0.683	0.24	0.124	0.879	0.243
58		AC9025	81.63	0.005	2.587	55	5.245	5.23	0.008	576.125	0.44	0.453	0.712	0.23	0.185	0.785	0.215
59		*AC9005	61.59	0.009	4.412	49	9.36	8.52	0.013	876.12	0.637	0.811	1.121	0.293	0.098	1.875	0.302
60		AC9059	76.29	0.004	3.562	40	6.14	4.63	0.012	430.8	0.48	0.367	0.652	0.19	0.162	0.776	0.325
61		*AC9076A	51.78	0.006	0.609	12	9.112	5.387	0.016	173.988	0.192	0.551	0.139	0.582	0.199	0.681	0.258
62		AC9063	81.52	0.003	2.874	30	5.23	4.58	0.014	294.3	0.42	0.486	0.732	0.11	0.223	0.721	0.346
63		AC9076	75.63	0.006	2.568	55	4.21	6.23	0.016	574.2	0.88	0.397	0.652	0.12	0.174	0.658	0.328
64		*AC9030	79.52	0.006	2.796	38	5.49	9.18	0.024	557.46	0.912	0.521	1.665	0.106	0.243	2.285	0.272
65		AC9081	72.41	0.005	1.235	45	4.63	5.21	0.018	442.8	0.81	0.421	0.559	0.08	0.165	0.842	0.214
66		*AC9058	46.528	0.005	2.132	40	5.336	3.615	0.023	358.04	0.92	0.245	1.126	0.42	0.123	1.428	0.278
67		AC9086	70.12	0.004	1.856	50	3.52	4.85	0.019	418.5	0.95	0.658	0.694	0.13	0.189	0.814	0.258
68		AC9095	65.28	0.004	2.214	30	4.21	5.28	0.017	284.7	0.51	0.532	0.712	0.21	0.214	0.786	0.223
69		*AC9028	71.125	0.007	2.789	32	6.91	8.46	0.023	491.84	0.736	0.918	1.365	0.062	0.119	2.302	0.311
70		AC9097	58.21	0.005	3.256	50	5.65	5.63	0.011	564	0.55	0.471	0.652	0.18	0.225	0.774	0.215
71		*AC9065	52.49	0.01	2.597	45	6.512	4.326	0.026	487.71	1.17	0.271	0.869	0.421	0.128	1.196	0.325
72		AC9099	55.36	0.004	1.254	40	5.32	4.96	0.008	411.2	0.32	0.329	0.559	0.17	0.189	0.658	0.219
73		AC9118	62.51	0.004	1.286	50	4.62	5.63	0.012	512.5	0.6	0.421	0.638	0.19	0.178	0.846	0.223
74		*AC9063	70.89	0.00497917	1.812	34	6.182	3.512	0.025	329.596	0.85	0.373	1.121	0.13	0.131	1.597	0.286
75		AC9155	65.38	0.005	2.542	40	3.58	5.68	0.014	370.4	0.56	0.432	0.611	0.22	0.162	0.723	0.224
76		AC9157	55.63	0.006	1.852	30	4.68	5.97	0.016	319.5	0.48	0.386	0.584	0.23	0.149	0.645	0.221
77		AC9232	72.14	0.007	1.528	50	5.24	4.85	0.011	504.5	0.55	0.412	1.121	0.18	0.115	1.124	0.251
78		*AC9006	65.132	0.0084375	3.852	46	7.382	8.596	0.014	734.988	0.644	0.741	1.189	0.165	0.123	1.896	0.292
79		AC9241	67.15	0.005	1.245	35	6.12	5.21	0.012	396.55	0.42	0.389	1.541	0.16	0.164	1.152	0.241
80		*AC9053A	39.52	0.004	0.792	16	3.657	2.923	0.005	105.28	0.08	0.14	0.856667	0.27	0.0131969	0.996667	0.235294
81		AC9248	68.24	0.004	2.123	40	5.48	5.65	0.011	445.2	0.44	0.468	1.329	0.223	0.148	1.128	0.218
82		AC9268	54.26	0.006	2.412	55	5.65	5.22	0.008	597.85	0.44	0.154	1.116	0.22	0.148	0.887	0.278
83		*AC9021	33.51	0.005	5.121	58	7.12	7.86	0.01	868.84	0.58	0.263	1.113	0.24	0.151	1.412	0.282
84		AC9273	51.35	0.004	2.136	60	5.32	4.76	0.012	604.8	0.72	0.365	0.897	0.23	0.164	0.985	0.235
85		*AC9038	45.12	0.008	4.397	52	7.79	9.008	0.02	873.496	1.04	0.911	1.638	0.22	0.281	2.543	0.281
86		AC9278	66.87	0.005	1.854	40	5.14	4.26	0.011	376	0.44	0.378	0.984	0.18	0.158	0.846	0.264
87		AC9077	52.35	0.004	1.742	35	4.878	5.13	0.014	350.28	0.49	0.418	0.998	0.15	0.089	1.114	0.283
88		AC9094	42.68	0.006	2.114	40	5.25	5.67	0.013	436.8	0.52	0.435	1.165	0.14	0.092	1.105	0.234
89		AC9096	40.32	0.005	2.431	30	6.12	5.47	0.011	347.7	0.33	0.428	1.143	0.16	0.098	0.785	0.225
90		*AC9035	49.12	0.006	2.187	25	5.687	9.865	0.022	388.8	0.55	0.903	1.754	0.15	0.118	2.657	0.295
91		AC9122	48	0.004	1.654	50	5.85	4.89	0.012	537	0.6	0.388	1.542	0.11	0.141	0.798	0.215
92		*AC9090	43.15	0.00641667	2.187	39	8.19	3.71	0.029	464.1	1.131	0.481	0.812	0.43	0.165	1.254	0.292
93		AC9127	45.21	0.005	1.742	55	4.98	4.65	0.011	529.65	0.605	0.357	1.878	0.12	0.164	0.845	0.222
94	Kerala	*Pk-21	48.12	0.00560417	5.783	98	5.469	5.896	0.006	1113.77	0.588	0.778	1.597	0.267	0.061	2.387	0.235
95		*Mahamaga	43.12	0.0070625	2.186	43	2.875	3.125	0.004	258	0.172	0.445	0.621	0.194	0.105	1.113	0.223
96		Umamata	45.26	0.0058125	1.39167	26	4.2	3.96	0.0035	212.16	0.091	0.54	0.93	0.21	0.179864	1.47	0.207143
97		* D1	41.852	0.005375	1.713	35	2.683	2.715	0.00375	188.93	0.13125	0.362	0.488	0.205	0.245	0.863	0.203
98		Uma	72.31	0.006	2.254	70	3.56	2.89	0.005	451.5	0.35	0.258	0.359	0.14	0.105	0.658	0.157
99		M-10	79.36	0.005	1.189	60	2.589	3.564	0.002	369.18	0.12	0.254	0.451	0.14	0.115	0.645	0.213
100		*Ezhoml-2	51	0.006	4.085	75	3.48	3.496	0.004	523.2	0.3	0.238	0.668	0.052	0.261	0.942	0.225
101		Nambial Amber	82.54	0.004	2.254	40	4.251	4.251	0.004	340.08	0.16	0.326	0.325	0.18	0.165	0.556	0.195
102		Aiswarya	68.25	0.006	1.457	50	3.269	3.256	0.003	326.25	0.15	0.289	0.463	0.14	0.215	0.821	0.214
103		*Kozhivalan	41.235	0.0055	3.812	68	4.52	4.312	0.00533333	600.576	0.362667	0.102	0.532	0.335	0.216	0.63	0.228
104		Kanchan	54.28	0.004	1.325	60	4.237	3.679	0.002	474.96	0.12	0.318	0.514	0.22	0.189	0.658	0.152
105		*Cheruvirippu	52.365	0.006	3.195	56	3.586	3.669	0.006	406.28	0.336	0.315	0.516	0.281	0.089	0.808	0.231
106		Kunje Kunje	65.37	0.004	2.156	55	3.685	4.557	0.005	453.31	0.275	0.452	0.328	0.16	0.225	0.725	0.116
107		Harsha	72.56	0.006	3.241	70	2.698	5.234	0.006	555.24	0.42	0.269	0.412	0.18	0.185	0.625	0.227
108		*Adira-3 Pallakad	41.256	0.00460417	2.915	52	6.425	5.486	0.007	619.372	0.364	0.539	0.846	0.217	0.112	1.345	0.232
109		Kanjana	55.84	0.005	1.258	65	3.564	4.268	0.005	509.08	0.325	0.462	0.369	0.22	0.235	0.821	0.185
110		Adhuthurai	62.38	0.006	2.654	60	4.258	6.241	0.007	629.94	0.42	0.358	0.358	0.18	0.242	0.632	0.226
111		*Gandhakasala	37.562	0.0035	3.286	60	3.845	2.845	0.004	401.4	0.24	0.74	0.69	0.145	0.102	1.412	0.231
112		Ambeponar	69.51	0.007	1.534	40	5.632	3.685	0.005	372.68	0.2	0.351	0.459	0.16	0.165	0.725	0.163
113		* Sreyas	53.458	0.0050625	1.811	32	3.854	3.387	0.00383333	231.712	0.122667	0.672	0.711	0.195	0.071	1.358	0.225
114		*Jaya	42.15	0.00635417	3.584	64	3.963	3.009	0.00466667	446.208	0.298667	0.529	0.511	0.244	0.279	1.011	0.228
115		Triveni	63.57	0.005	2.162	70	4.251	3.568	0.004	547.33	0.28	0.456	0.389	0.19	0.342	1.235	0.224
116		*PK6	45.12	0.00519167	2.345	46	2.228	3.415	0.00475	259.578	0.2185	0.463333	0.635	0.18	0.165	1.079	0.211
117		Chengarama	71.45	0.006	1.463	65	3.125	4.251	0.006	479.44	0.39	0.263	0.412	0.21	0.258	1.212	0.221
118		*Adira-1 Pallakad	48.15	0.00608333	1.593	28	6.512	7.096	0.00763333	381.024	0.213733	0.235	0.891	0.408	0.071	1.121	0.236
119		*Jyothi	44.16	0.00470833	1.512	29	3.426	3.128	0.004	190.066	0.116	0.418	0.732	0.184	0.256	1.146	0.211
120		Kuttosam	69.24	0.004	1.586	40	2.897	3.982	0.005	275.16	0.2	0.328	0.383	0.18	0.126	0.825	0.156
121		Thavalakkaman	72.65	0.005	1.458	40	3.458	4.256	0.005	308.56	0.2	0.337	0.396	0.2	0.154	0.875	0.163
122		*Marathondi	51.26	0.00777083	1.356	26	4.11	5.984	0.00425	262.444	0.1105	0.387	1.075	0.41	0.061	1.329	0.231
123		Champan mata	58.23	0.006	1.512	55	4.578	5.124	0.006	533.61	0.33	0.346	0.423	0.18	0.187	0.965	0.187
124		Kalladiyaran	69.21	0.004	2.112	60	5.112	5.147	0.004	615.54	0.24	0.298	0.408	0.21	0.196	0.745	0.176
125		*Adira-2 Pallakad	56.12	0.0049375	5.045	85	7.854	7.368	0.00683333	1293.87	0.580833	0.748	0.851	0.425	0.073	1.632	0.238
126		Onam	66.14	0.005	1.856	58	4.968	5.421	0.005	602.562	0.29	0.311	0.374	0.14	0.214	0.758	0.189
127		*Vachaw	42.56	0.00677083	4.786	82	3.986	3.11	0.00733333	581.872	0.601333	0.396	0.242	0.212	0.115	0.633	0.236
128		Nooravella	60.52	0.006	1.963	50	5.112	4.562	0.005	483.7	0.25	0.302	0.368	0.18	0.211	0.942	0.195
129		Airweraga	49.12	0.00454167	2.008	38	3.08	3.986	0.0035	268.508	0.133	0.238	0.586	0.49	0.133	0.836	0.221
130		Chetadi	58.76	0.005	1.85	42	4.879	4.325	0.006	386.568	0.252	0.412	0.411	0.2	0.217	0.932	0.184
131		Amballavalaya	65.12	0.003	1.789	38	5.114	4.125	0.005	351.082	0.19	0.405	0.453	0.22	0.231	0.914	0.211
132	Jeypore	AC20117	57.34	0.005	2.104	42	4.68	6.21	0.012	457.38	0.504	0.58	0.584	0.4	0.112	0.847	0.232
133		*AC20770	45.236	0.00645833	3.496	58	2.864	9.08	0.006	692.752	0.348	0.293	1.209	0.253	0.052	1.512	0.248
134		AC20436	52.61	0.00829167	2.45	42	7.15	7.53	0.00725	616.56	0.3045	0.973333	1.09	0.38	0.170198	2.06333	0.230769
135		*AC20423	51.249	0.006	1.658	34	7.596	7.18	0.012	502.384	0.408	1.085	0.612	0.208	0.149	1.712	0.218
136		AC20604	48.25	0.00552083	2.51667	40	5.22	6.96	0.0065	487.2	0.26	0.996667	0.94	0.39	0.14085	1.93667	0.243844
137		*AC20614	38.261	0.00602083	2.482	42	4.581	4.716	0.00683333	390.474	0.287	0.318	0.199	0.43	0.153	0.519	0.241
138		*AC20686	44.586	0.004125	1.08	18	4.782	5.684	0.003	188.388	0.054	0.152	0.208	0.207	0.162	0.374	0.256
139		AC20690	49.67	0.00466667	2.325	36	5.95	6.2	0.00425	437.4	0.153	0.246667	0.643333	0.21	0.10683	0.89	0.24808
140		*AC20845	83.45	0.00935417	2.513	43	6.598	8.184	0.015	635.626	0.645	0.532	1.081	0.136	0.112	1.349	0.231
141		*AC20627	41.857	0.0060625	2.568	42	4.562	6.895	0.005	481.194	0.21	0.229	0.705	0.386	0.014	0.928	0.248
142		AC20071	62.31	0.004	1.324	55	5.142	6.15	0.012	621.06	0.66	0.645	0.687	0.24	0.185	0.857	0.214
143		*AC20664	53.245	0.00577083	0.992	18	3.712	3.998	0.006	138.78	0.108	0.225	0.293	0.432	0.084	0.519	0.236
144		*AC20907	77.568	0.00672917	1.689	30	4.658	5.558	0.0055	306.48	0.165	0.271	0.528	0.412	0.069	0.812	0.228
145		AC20081	60.14	0.005	1.121	50	5.425	4.85	0.008	513.75	0.4	0.55	0.745	0.35	0.151	0.754	0.205
146		*AC20246	59.12	0.00720833	3.185	48	5.476	5.12	0.0095	508.608	0.456	0.409	0.876	0.57	0.145	1.278	0.271
147		AC20095	58.16	0.006	2.145	45	4.875	5.23	0.011	454.725	0.495	0.54	0.732	0.38	0.164	0.658	0.218
148		AC20113	60.18	0.004	2.112	48	5.11	5.14	0.01	492	0.48	0.48	0.685	0.41	0.089	0.712	0.234
149		*AC20282	77.56	0.008	4.459	68	7.104	9.145	0.0113333	1104.93	0.770667	0.895	1.192	0.4	0.105	2.019	0.258
150		*AC20328	73	0.00729167	6.119	84	6.187	8.315	0.0135	1218.17	1.134	0.562	1.085	0.36	0.105	1.589	0.287
151		AC20119	55.11	0.004	1.854	40	5.24	5.89	0.008	445.2	0.32	0.565	0.657	0.12	0.104	1.125	0.189
152		*AC20371	50.75	0.00718056	7.13333	92	5.84	8.60667	0.0131667	1329.09	1.21133	0.333333	1.15333	0.3	0.106841	1.48667	0.301361
153		AC20121	58.21	0.006	1.758	35	4.895	6.11	0.007	385.175	0.245	0.614	0.711	0.28	0.164	1.321	0.192
154		*AC20347	66.57	0.007	1.619	30	4.102	7.007	0.0045	333.27	0.135	0.558	0.687	0.4	0.15	1.248	0.218
155		AC20128	60.14	0.004	1.658	40	5.11	5.42	0.006	421.2	0.24	0.345	0.987	0.32	0.152	0.845	0.211
156		*AC20362	57.12	0.00625	6.114	85	5.542	7.716	0.0105	1126.93	0.8925	0.395	0.782	0.562	0.0998481	1.179	0.293
157		*AC20389	62.354	0.00622917	5.654	82	5.47	6.832	0.013	1008.76	1.066	0.508	0.711	0.286	0.112	1.114	0.275
158		AC20136	62.45	0.005	1.897	45	4.68	5.13	0.009	441.45	0.405	0.452	0.841	0.3	0.147	0.741	0.208
159		*AC20317	52.124	0.008	5.019	70	3.815	4.623	0.012	590.66	0.84	0.351	0.172	0.338	0.148	0.452	0.291
160		*AC20920	56.214	0.007	3.412	58	4.375	8.612	0.01	753.246	0.58	1.118	0.935	0.28	0.043	2.081	0.223
161		AC20137	45.38	0.004	2.147	50	5.21	5.46	0.01	533.5	0.5	0.478	0.743	0.28	0.138	0.785	0.217
162	Assam	AC5946	47.52	0.006	0.875	42	3.29	4.12	0.003	311.22	0.126	0.378	0.52	0.21	0.168	0.845	0.165
163		*AC10187	52.36	0.0059375	4.331	80	8.243	4.87	0.006	1049.04	0.48	1.853	0.672	0.228	0.159	2.587	0.21
164		AC6006	61.25	0.00554167	0.858333	18	4.17	2.47	0.008	119.52	0.144	0.823333	0.57	0.26	0.129692	1.39333	0.187063
165		*AC6023	48.623	0.007	0.746	16	5.481	3.748	0.01	147.664	0.16	1.078	0.958	0.4	0.128	2.145	0.197
166		AC6617	55.28	0.0069375	0.733333	16	3.84	3.95	0.03	124.64	0.48	0.633333	0.94	0.18	0.361954	1.57333	0.181818
167		*AC7008	81.65	0.006	0.739	16	4.234	3.996	0.0055	131.68	0.088	0.669	0.725	0.118	0.196	1.423	0.186
168		AC7009	78.61	0.00529167	0.675	14	4.07	4.29	0.00375	117.04	0.0525	0.563333	0.53	0.08	0.0880456	1.09333	0.187063
169		AC7124	58.63	0.00633333	0.55	12	3.06	2.36	0.00425	65.04	0.051	0.29	0.373333	0.09	0.152742	0.663333	0.181818
170		AC7204	39.54	0.0039375	0.733333	16	3.68	3.44	0.0125	113.92	0.2	0.656667	0.763333	0.43	0.314415	1.42	0.181818
171		*AC7269	33.12	0.00370833	0.828	20	3.29	2.873	0.008	123.26	0.16	0.612	0.668	0.673	0.251	1.243	0.191
172		AC10333	56.37	0.0065625	1.31667	30	3.49	3.13	0.00366667	198.6	0.11	0.376667	0.63	0.08	0.137318	1.00667	0.174457
173		AC10438	54.68	0.0076875	0.8	16	3.19	2.31	0.0045	88	0.072	0.496667	0.31	0.11	0.217738	0.806667	0.196154
174		*AC10608	39.4	0.00483333	1.95833	38	4.4	4.03	0.004625	320.34	0.17575	0.44	0.85	0.12	0.120883	1.29	0.200133
175		AC5757	42.25	0.005	0.785	42	4.56	4.25	0.004	370.02	0.168	0.458	0.445	0.14	0.185	1.142	0.184
176		AC5768	35.64	0.006	0.856	40	4.38	3.85	0.003	329.2	0.12	0.521	0.352	0.15	0.214	1.365	0.175
177		AC5813	47.26	0.004	0.984	38	3.58	4.12	0.005	292.6	0.19	0.468	0.412	0.21	0.165	1.254	0.168
178		AC5828	49.36	0.005	0.789	35	5.25	3.65	0.006	311.5	0.21	0.523	0.425	0.22	0.321	1.157	0.205
179		AC5832	51.24	0.003	0.986	45	4.89	3.25	0.005	366.3	0.225	0.356	0.456	0.18	0.221	0.987	0.165
180		AC5840	55.68	0.004	0.952	55	3.65	2.56	0.004	341.55	0.22	0.412	0.44	0.16	0.135	0.864	0.154
181		*AC6183	63.17	0.00475	1.864	38	8.796	3.725	0.0055	475.798	0.209	1.638	0.54	0.36	0.193	2.143	0.227
182		AC5951	51.64	0.005	0.862	40	3.76	3.61	0.005	294.8	0.2	0.402	0.412	0.18	0.176	0.758	0.132
183		AC5965	48.26	0.004	0.841	38	4.52	3.85	0.007	318.06	0.266	0.386	0.52	0.19	0.211	0.897	0.154
184		*AC6027	32.64	0.00535417	0.823	20	3.845	3.657	0.006	150.04	0.12	0.561	1.021	0.176	0.249	1.632	0.193
185		*AC10162	68	0.00704167	1.196	30	5.08	4.08	0.005	274.8	0.15	1.098	0.925	0.368	0.087	1.996	0.196
186		AC6148	52.34	0.003	0.987	28	4.69	4.25	0.005	250.32	0.14	0.256	0.51	0.23	0.185	1.114	0.178
187		*AC7282	48.69	0.00722917	0.908	22	4.19	4.17	0.005	183.92	0.11	0.921	0.986	0.38	0.083	1.225	0.189
188		AC6156	40.25	0.005	1.235	30	5.64	3.25	0.006	266.7	0.18	0.425	0.48	0.24	0.221	1.125	0.162
189		AC6235	46.15	0.004	1.12	32	4.63	3.36	0.005	255.68	0.16	0.586	0.47	0.14	0.185	0.875	0.158
190		*AC6221	49.36	0.00495833	3.649	68	4.1	3.13	0.0055	491.64	0.374	0.619	0.669	0.18	0.32	1.279	0.213
191		AC6237	51.48	0.005	0.984	20	5.28	2.85	0.004	162.6	0.08	0.478	0.52	0.15	0.265	0.985	0.143
192		AC6562	48.65	0.006	0.875	35	3.86	4.63	0.005	297.15	0.175	0.598	0.45	0.16	0.145	0.985	0.189
193		AC6571	49.35	0.005	0.945	34	3.76	4.25	0.004	272.34	0.136	0.514	0.51	0.2	0.157	1.124	0.171
194		*AC-5993	57.285	0.006	0.728	18	3.09	2.41	0.004	99	0.072	0.249	0.312	0.349	0.352	0.568	0.186
195		AC6633	50.47	0.004	0.852	38	4.58	3.85	0.003	320.34	0.114	0.486	0.48	0.18	0.152	1.145	0.135
196		*AC7134	36.13	0.00579167	0.909	22	3.798	3.332	0.005	156.86	0.11	0.681	0.679	0.288	0.227	1.293	0.189
197		AC7031	55.87	0.005	0.785	40	5.14	3.69	0.004	353.2	0.16	0.385	0.41	0.2	0.148	1.045	0.138
198		AC7041	62.45	0.004	0.951	42	4.85	5.98	0.005	454.86	0.21	0.547	0.47	0.22	0.176	0.984	0.149
199		*AC6170	47.985	0.00529167	4256	85	3.284	2.853	0.00216667	521.645	0.184167	0.452	0.582	0.208	0.108	1.018	0.209
200		AC7073	67.89	0.004	0.845	48	4.63	4.27	0.006	427.2	0.288	0.512	0.48	0.18	0.138	0.853	0.162
201		*AC6007	38.167	0.00583333	1.519	30	5.754	4.582	0.007	310.08	0.21	0.962	0.884	0.235	0.096	1.752	0.188
202		AC7089	71.15	0.003	0.836	30	5.12	3.95	0.005	272.1	0.15	0.485	0.51	0.2	0.149	1.237	0.178
203		AC7093	69.23	0.003	0.776	50	3.85	4.12	0.008	398.5	0.4	0.496	0.42	0.18	0.224	0.995	0.194
204		*AC6172	66.12	0.006	4.325	78	4.28	4.29	0.006125	668.46	0.47775	0.623	0.448	0.23	0.272	1.035	0.219
205		AC7188	55.84	0.005	0.842	52	4.12	3.28	0.005	384.8	0.26	0.418	0.4	0.22	0.157	0.869	0.208
206		AC 7135	48.67	0.004	0.811	48	3.98	3.65	0.006	366.24	0.288	0.425	0.45	0.2	0.142	0.794	0.114
207		AC 7147	52.49	0.005	0.893	40	4.25	3.78	0.003	321.2	0.12	0.432	0.42	0.16	0.138	0.852	0.138
208	MP	Polina dhan 2	46.32	0.00720833	0.691667	12	2.99	3.65	0.0045	79.68	0.054	0.19	0.626	0.22	0.15904	0.816	0.217647
209		Gerwa thor	44.23	0.00470833	1.825	30	5.07	4.21	0.003	278.4	0.09	0.696667	0.693333	0.59	0.163	1.39	0.232143
210		*Uttarbanga local-9	60.45	0.005	0.612	12	3.46	2.27	0.0045	68.76	0.054	0.213	0.112	0.16	0.169	0.321	0.243
211		Rohidhan-1	28.94	0.00577083	1.01667	18	3.44	5.82	0.0045	166.68	0.081	0.176667	0.88	0.14	0.216838	1.05667	0.218254
212		*Joha	41.28	0.00514583	1.15	22	2.53	2.76	0.005	116.38	0.11	0.24	0.29	0.208	0.189	0.512	0.213
213		Manahar rathori	45.25	0.00702083	0.75	14	3.06	2.99	0.005	84.7	0.07	0.323333	0.43	0.09	0.23299	0.753333	0.212406
214		Ganrohibuna	48.62	0.007125	0.25	4	3.35	3.85	0.005	28.8	0.02	0.143333	0.58	0.22	0.182818	0.723333	0.25
215		Kadamful	52.72	0.005625	0.35	6	3.72	3.64	0.005	44.16	0.03	0.703333	0.54	0.17	0.182818	1.24333	0.236111
216		*Jhingesal	48.36	0.00420833	2.213	35	5.71	5.21	0.006	382.2	0.21	0.63	0.942	0.38	0.189	1.552	0.249
217		Bakul dhan	56.28	0.00333333	3.325	48	3.77	2.38	0.002	295.2	0.096	0.476667	0.173333	0.31	0.0455002	0.65	0.267647
218		*Gochi	53.8	0.00475	1.66667	26	2.71	3.9	0.0045	171.86	0.117	0.25	0.446667	0.09	0.15904	0.696667	0.24569
219		Kaikee	48.21	0.005	0.25	40	3.09	3.45	0.0075	261.6	0.3	0.413333	0.726667	0.25	0.241193	1.14	0.25
220		*Palina dhan-1	33.12	0.00329167	0.956	16	3.312	3.21	0.003	104.352	0.048	0.273	0.659	0.3	0.081	0.931	0.241
221		Bathi dhan	51.25	0.002	1.235	35	3.256	4.12	0.003	258.16	0.105	0.235	0.345	0.25	0.189	1.256	0.221
222		Kauka	55.63	0.004	0.987	40	2.598	3.25	0.004	233.92	0.16	0.185	0.542	0.145	0.221	0.956	0.238
223		Param nada	64.25	0.003	0.865	45	3.567	3.58	0.002	321.615	0.09	0.214	0.446	0.26	0.154	0.845	0.256
224		Sitaluchi	48.67	0.002	1.114	55	2.985	3.69	0.005	367.125	0.275	0.165	0.441	0.18	0.196	1.121	0.185
225		*Shayam	35.89	0.004	5.458	80	4.92	3.76	0.001625	694.4	0.13	0.83	0.479	0.26	0.073	1.245	0.286
226		Kukurjali	42.95	0.004	2.135	35	3.124	4.12	0.004	253.54	0.14	0.236	0.384	0.16	0.253	0.856	0.197
227		Durudhan	51.37	0.003	1.125	40	2.568	3.56	0.003	245.12	0.12	0.354	0.376	0.22	0.146	0.997	0.212
228		Khara	55.48	0.002	0.987	25	3.456	4.536	0.002	199.8	0.05	0.285	0.449	0.32	0.165	1.243	0.254
229		Hetomari	32.46	0.005	0.864	30	4.251	3.258	0.004	225.27	0.12	0.312	0.521	0.25	0.194	0.987	0.232
230		*Dad ghani	38.59	0.00510417	3.365	52	3.18	3.96	0.00275	371.28	0.143	0.134	0.36	0.18	0.098	0.487	0.263
231		Khajurchar	62.57	0.004	1.265	40	3.589	4.569	0.003	326.32	0.12	0.242	0.436	0.17	0.218	1.658	0.215
232		Pawan dhan	63.41	0.002	1.587	55	3.654	5.214	0.004	487.74	0.22	0.253	0.385	0.23	0.225	2.145	0.249
233		Meghjawain	58.29	0.003	2.116	65	2.687	4.725	0.002	481.78	0.13	0.358	0.512	0.165	0.165	1.352	0.182
234		*Basumati-B	26.21	0.00210417	5.656	82	2.284	3.754	0.002625	495.116	0.21525	0.296	0.673	0.294	0.069	0.946	0.263
235		Bharati	43.57	0.002	1.895	40	2.632	3.658	0.005	251.6	0.2	0.264	0.469	0.21	0.235	1.475	0.149
236		*Chatui muchi	27	0.0045625	5.785	84	3.745	3.28	0.003875	590.1	0.3255	0.656	0.512	0.2	0.137	1.148	0.261
237		Seshphal	44.21	0.004	0.982	35	3.213	3.854	0.003	247.345	0.105	0.349	0.327	0.15	0.186	1.698	0.164
238		Kaalibank	52.62	0.005	0.886	30	3.546	4.265	0.004	234.33	0.12	0.284	0.365	0.23	0.221	0.987	0.213
239		kaloghande swari	55.61	0.005	1.112	30	2.154	4.214	0.004	191.04	0.12	0.412	0.258	0.18	0.089	0.874	0.185
240		Jaldhapa	68.25	0.004	1.015	40	2.857	5.23	0.003	323.48	0.12	0.385	0.247	0.2	0.211	0.965	0.192
241		*Jhagri kartik	23.56	0.0048125	1.225	22	6.32	3.25	0.00275	210.54	0.0605	0.948	0.327	0.512	0.104	1.257	0.226
242		Chingrifuli	70.15	0.005	1.258	42	3.114	6.147	0.005	388.962	0.21	0.248	0.312	0.28	0.205	0.771	0.164
243		Lalkadhan	65.21	0.004	0.875	35	2.458	5.142	0.004	266	0.14	0.251	0.249	0.22	0.185	0.845	0.208
244		*Bharati	82.14	0.007	0.825	16	4.231	5.126	0.005	149.712	0.08	0.124	0.736	0.2	0.179	0.864	0.235
245		Moriadhan	58.21	0.003	0.912	55	1.857	5.748	0.005	418.275	0.275	0.341	0.225	0.28	0.198	0.961	0.149
246		Kashiyabinni	60.35	0.002	0.856	45	1.452	3.578	0.006	226.35	0.27	0.335	0.214	0.16	0.148	1.102	0.168
247		Kotki	65.41	0.004	0.924	40	1.258	4.572	0.005	233.2	0.2	0.287	0.278	0.2	0.151	0.995	0.198
248		*Sugandha-2	20.85	0.00279167	5.763	86	3.985	2.735	0.005	577.92	0.43	0.448	0.429	0.238	0.033	0.92	0.279
249		Domnadhan	55.87	0.002	0.785	38	2.356	5.142	0.004	284.924	0.152	0.291	0.158	0.18	0.128	0.976	0.208
250		Kauka	60.21	0.005	0.886	30	3.145	5.141	0.005	248.58	0.15	0.265	0.214	0.22	0.149	1.114	0.211
		CV %	10.83	12.8	12.3	10.25	9.21	9.85	12.87	11.39	12.7	13.86	11.53	10.52	12.58	11.59	9.13
		LSD5%	11.62	0.00392	1.26	10.56	1.21	1.24	0.00636	1687	0.169	0.312	0.152	0.094	0.097	0.412	4.92
