# Supplementary material for: Genetic Analysis for Mapping of Physiological Traits Related to Seed Vigour in Rice Through Association Mapping
Source: Research Square preprint supplement (doi:10.21203/rs.3.rs-288996/v1), 2021-03-16
Supplement: Supplementary file 2 [file c740eebdd646dd643875bb64.csv]

Supplementary Table 4. Significant marker-trait associations detected for physiological traits using MLM approach at p<0.01
Trait	Marker	Chr	Pos	df	F	p	add_effect	add_F	add_p	dom_effect	dom_F	dom_p	errordf	MarkerR2	Genetic Var	Residual Var	-2LnLikelihood
EC	None			0	NaN	NaN	NaN	NaN	NaN	NaN	NaN	NaN	91	NaN	76.5926	60.21034	701.97936
EC	AB-2	Unknown	78	1	NaN	NaN	NaN	NaN	NaN	NaN	NaN	NaN	96	NaN	76.5926	60.21034	701.97936
EC	CX-1	Unknown	277	1	NaN	NaN	NaN	NaN	NaN	NaN	NaN	NaN	96	NaN	76.5926	60.21034	701.97936
ROI	None			0	NaN	NaN	NaN	NaN	NaN	NaN	NaN	NaN	91	NaN	1.30E-06	1.07E-06	-9.62E+02
ROI	Q-1	Unknown	48	1	8.02145	0.00572	NaN	NaN	NaN	NaN	NaN	NaN	96	0.07881	1.30E-06	1.07E-06	-9.62E+02
ROI	AB-2	Unknown	78	1	NaN	NaN	NaN	NaN	NaN	NaN	NaN	NaN	96	NaN	1.30E-06	1.07E-06	-9.62E+02
ROI	BG-1	Unknown	155	1	7.17908	0.00879	NaN	NaN	NaN	NaN	NaN	NaN	96	0.07053	1.30E-06	1.07E-06	-9.62E+02
ROI	CG-2	Unknown	218	1	7.3933	0.00787	NaN	NaN	NaN	NaN	NaN	NaN	96	0.07264	1.30E-06	1.07E-06	-9.62E+02
ROI	CX-1	Unknown	277	1	NaN	NaN	NaN	NaN	NaN	NaN	NaN	NaN	96	NaN	1.30E-06	1.07E-06	-9.62E+02
ROI	CY-2	Unknown	281	1	7.83403	0.00629	NaN	NaN	NaN	NaN	NaN	NaN	96	0.07697	1.30E-06	1.07E-06	-9.62E+02
GI	None			0	NaN	NaN	NaN	NaN	NaN	NaN	NaN	NaN	91	NaN	1.31492	1.9435	332.57005
GI	N-2	Unknown	42	1	9.07904	0.00337	NaN	NaN	NaN	NaN	NaN	NaN	96	0.09355	1.31492	1.9435	332.57005
GI	AB-2	Unknown	78	1	NaN	NaN	NaN	NaN	NaN	NaN	NaN	NaN	96	NaN	1.31492	1.9435	332.57005
GI	AH-1	Unknown	92	1	12.50148	6.48E-04	NaN	NaN	NaN	NaN	NaN	NaN	96	0.12881	1.31492	1.9435	332.57005
GI	AU-3	Unknown	125	1	7.28108	0.00834	NaN	NaN	NaN	NaN	NaN	NaN	96	0.07502	1.31492	1.9435	332.57005
GI	AV-2	Unknown	127	1	7.22205	0.00859	NaN	NaN	NaN	NaN	NaN	NaN	96	0.07442	1.31492	1.9435	332.57005
GI	BO-2	Unknown	177	1	16.95205	8.56E-05	NaN	NaN	NaN	NaN	NaN	NaN	96	0.17467	1.31492	1.9435	332.57005
GI	CX-1	Unknown	277	1	NaN	NaN	NaN	NaN	NaN	NaN	NaN	NaN	96	NaN	1.31492	1.9435	332.57005
GI	CZ-3	Unknown	284	1	8.7923	0.00388	NaN	NaN	NaN	NaN	NaN	NaN	96	0.09059	1.31492	1.9435	332.57005
G	None			0	NaN	NaN	NaN	NaN	NaN	NaN	NaN	NaN	91	NaN	236.63162	417.21201	813.88758
G	N-2	Unknown	42	1	8.21038	0.0052	NaN	NaN	NaN	NaN	NaN	NaN	96	0.08554	236.63162	417.21201	813.88758
G	AB-2	Unknown	78	1	NaN	NaN	NaN	NaN	NaN	NaN	NaN	NaN	96	NaN	236.63162	417.21201	813.88758
G	AH-1	Unknown	92	1	10.84335	0.00142	NaN	NaN	NaN	NaN	NaN	NaN	96	0.11297	236.63162	417.21201	813.88758
G	BO-2	Unknown	177	1	10.41549	0.00175	NaN	NaN	NaN	NaN	NaN	NaN	96	0.10851	236.63162	417.21201	813.88758
G	CX-1	Unknown	277	1	NaN	NaN	NaN	NaN	NaN	NaN	NaN	NaN	96	NaN	236.63162	417.21201	813.88758
RL	None			0	NaN	NaN	NaN	NaN	NaN	NaN	NaN	NaN	91	NaN	2.76429	2.34135	341.5132
RL	AB-2	Unknown	78	1	NaN	NaN	NaN	NaN	NaN	NaN	NaN	NaN	96	NaN	2.76429	2.34135	341.5132
RL	AU-3	Unknown	125	1	9.59904	0.00261	NaN	NaN	NaN	NaN	NaN	NaN	96	0.09878	2.76429	2.34135	341.5132
RL	BW-2	Unknown	196	1	7.21562	0.00862	NaN	NaN	NaN	NaN	NaN	NaN	96	0.07426	2.76429	2.34135	341.5132
RL	CX-1	Unknown	277	1	NaN	NaN	NaN	NaN	NaN	NaN	NaN	NaN	96	NaN	2.76429	2.34135	341.5132
SL	None			0	NaN	NaN	NaN	NaN	NaN	NaN	NaN	NaN	91	NaN	2.18258	0.75844	347.06389
SL	AB-2	Unknown	78	1	NaN	NaN	NaN	NaN	NaN	NaN	NaN	NaN	96	NaN	2.18258	0.75844	347.06389
SL	BG-1	Unknown	155	1	7.56823	0.0072	NaN	NaN	NaN	NaN	NaN	NaN	96	0.07822	2.18258	0.75844	347.06389
SL	CX-1	Unknown	277	1	NaN	NaN	NaN	NaN	NaN	NaN	NaN	NaN	96	NaN	2.18258	0.75844	347.06389
SDW	None			0	NaN	NaN	NaN	NaN	NaN	NaN	NaN	NaN	91	NaN	2.73E-05	6.41E-06	-7.40E+02
SDW	M-2	Unknown	40	1	7.26854	0.00839	NaN	NaN	NaN	NaN	NaN	NaN	96	0.07231	2.73E-05	6.41E-06	-7.40E+02
SDW	P-1	Unknown	45	1	9.32851	0.00298	NaN	NaN	NaN	NaN	NaN	NaN	96	0.09281	2.73E-05	6.41E-06	-7.40E+02
SDW	AB-2	Unknown	78	1	NaN	NaN	NaN	NaN	NaN	NaN	NaN	NaN	96	NaN	2.73E-05	6.41E-06	-7.40E+02
SDW	CP-1	Unknown	248	1	10.16479	0.00198	NaN	NaN	NaN	NaN	NaN	NaN	96	0.10113	2.73E-05	6.41E-06	-7.40E+02
SDW	CU-5	Unknown	269	1	7.46054	0.0076	NaN	NaN	NaN	NaN	NaN	NaN	96	0.07422	2.73E-05	6.41E-06	-7.40E+02
SDW	CX-1	Unknown	277	1	NaN	NaN	NaN	NaN	NaN	NaN	NaN	NaN	96	NaN	2.73E-05	6.41E-06	-7.40E+02
SVI-1	None			0	NaN	NaN	NaN	NaN	NaN	NaN	NaN	NaN	91	NaN	44301.64581	45667.43967	1288.03876
SVI-1	AB-2	Unknown	78	1	NaN	NaN	NaN	NaN	NaN	NaN	NaN	NaN	96	NaN	44301.64581	45667.43967	1288.03876
SVI-1	CX-1	Unknown	277	1	NaN	NaN	NaN	NaN	NaN	NaN	NaN	NaN	96	NaN	44301.64581	45667.43967	1288.03876
SVI-1	CZ-3	Unknown	284	1	10.39564	0.00177	NaN	NaN	NaN	NaN	NaN	NaN	96	0.11096	44301.64581	45667.43967	1288.03876
SVI-2	None			0	NaN	NaN	NaN	NaN	NaN	NaN	NaN	NaN	91	NaN	0.06827	0.04956	12.60324
SVI-2	AB-2	Unknown	78	1	NaN	NaN	NaN	NaN	NaN	NaN	NaN	NaN	96	NaN	0.06827	0.04956	12.60324
SVI-2	AE-2	Unknown	86	1	8.94579	0.0036	NaN	NaN	NaN	NaN	NaN	NaN	96	0.09572	0.06827	0.04956	12.60324
SVI-2	AX-1	Unknown	132	1	9.70644	0.00247	NaN	NaN	NaN	NaN	NaN	NaN	96	0.10386	0.06827	0.04956	12.60324
SVI-2	CX-1	Unknown	277	1	NaN	NaN	NaN	NaN	NaN	NaN	NaN	NaN	96	NaN	0.06827	0.04956	12.60324
SVI-2	CZ-3	Unknown	284	1	8.84629	0.00378	NaN	NaN	NaN	NaN	NaN	NaN	96	0.09466	0.06827	0.04956	12.60324
RRG	None			0	NaN	NaN	NaN	NaN	NaN	NaN	NaN	NaN	91	NaN	0.05313	0.04734	54.17055
RRG	AB-2	Unknown	78	1	NaN	NaN	NaN	NaN	NaN	NaN	NaN	NaN	96	NaN	0.05313	0.04734	54.17055
RRG	AJ-1	Unknown	96	1	7.36259	0.008	NaN	NaN	NaN	NaN	NaN	NaN	96	0.07881	0.05313	0.04734	54.17055
RRG	AJ-2	Unknown	97	1	8.11243	0.00546	NaN	NaN	NaN	NaN	NaN	NaN	96	0.08683	0.05313	0.04734	54.17055
RRG	CU-3	Unknown	267	1	7.97704	0.00585	NaN	NaN	NaN	NaN	NaN	NaN	96	0.08539	0.05313	0.04734	54.17055
RRG	CX-1	Unknown	277	1	NaN	NaN	NaN	NaN	NaN	NaN	NaN	NaN	96	NaN	0.05313	0.04734	54.17055
RSG	None			0	NaN	NaN	NaN	NaN	NaN	NaN	NaN	NaN	91	NaN	0.14584	0.10051	59.26054
RSG	P-1	Unknown	45	1	7.96593	0.00588	NaN	NaN	NaN	NaN	NaN	NaN	96	0.08679	0.14584	0.10051	59.26054
RSG	AB-2	Unknown	78	1	NaN	NaN	NaN	NaN	NaN	NaN	NaN	NaN	96	NaN	0.14584	0.10051	59.26054
RSG	AX-1	Unknown	132	1	12.99803	5.14E-04	NaN	NaN	NaN	NaN	NaN	NaN	96	0.14162	0.14584	0.10051	59.26054
RSG	BB-2	Unknown	145	1	7.27751	0.00835	NaN	NaN	NaN	NaN	NaN	NaN	96	0.07929	0.14584	0.10051	59.26054
RSG	CX-1	Unknown	277	1	NaN	NaN	NaN	NaN	NaN	NaN	NaN	NaN	96	NaN	0.14584	0.10051	59.26054
RSG	DD-2	Unknown	300	1	7.07678	0.00926	NaN	NaN	NaN	NaN	NaN	NaN	96	0.07711	0.14584	0.10051	59.26054
RP	None			0	NaN	NaN	NaN	NaN	NaN	NaN	NaN	NaN	91	NaN	0.01376	0.02179	-8.14E+01
RP	AB-2	Unknown	78	1	NaN	NaN	NaN	NaN	NaN	NaN	NaN	NaN	96	NaN	0.01376	0.02179	-8.14E+01
RP	BQ-2	Unknown	182	1	7.48432	0.00751	NaN	NaN	NaN	NaN	NaN	NaN	96	0.07009	0.01376	0.02179	-8.14E+01
RP	BQ-3	Unknown	183	1	7.46605	0.00758	NaN	NaN	NaN	NaN	NaN	NaN	96	0.06992	0.01376	0.02179	-8.14E+01
RP	CN-3	Unknown	240	1	8.35148	0.00484	NaN	NaN	NaN	NaN	NaN	NaN	96	0.07821	0.01376	0.02179	-8.14E+01
RP	CN-5	Unknown	242	1	17.75344	6.01E-05	NaN	NaN	NaN	NaN	NaN	NaN	96	0.16625	0.01376	0.02179	-8.14E+01
RP	CX-1	Unknown	277	1	NaN	NaN	NaN	NaN	NaN	NaN	NaN	NaN	96	NaN	0.01376	0.02179	-8.14E+01
RGR	None			0	NaN	NaN	NaN	NaN	NaN	NaN	NaN	NaN	91	NaN	5.38E-04	0.00487	-2.18E+02
RGR	T-2	Unknown	55	1	7.59213	0.00711	NaN	NaN	NaN	NaN	NaN	NaN	96	0.07971	5.38E-04	0.00487	-2.18E+02
RGR	AB-2	Unknown	78	1	NaN	NaN	NaN	NaN	NaN	NaN	NaN	NaN	96	NaN	5.38E-04	0.00487	-2.18E+02
RGR	CW-1	Unknown	275	1	7.49192	0.00748	NaN	NaN	NaN	NaN	NaN	NaN	96	0.07866	5.38E-04	0.00487	-2.18E+02
RGR	CX-1	Unknown	277	1	NaN	NaN	NaN	NaN	NaN	NaN	NaN	NaN	96	NaN	5.38E-04	0.00487	-2.18E+02
AGR	None			0	NaN	NaN	NaN	NaN	NaN	NaN	NaN	NaN	91	NaN	0.26174	0.24549	138.02536
AGR	AB-2	Unknown	78	1	NaN	NaN	NaN	NaN	NaN	NaN	NaN	NaN	96	NaN	0.26174	0.24549	138.02536
AGR	AC-2	Unknown	82	1	8.1212	0.00544	NaN	NaN	NaN	NaN	NaN	NaN	96	0.0878	0.26174	0.24549	138.02536
AGR	AJ-2	Unknown	97	1	6.94416	0.00992	NaN	NaN	NaN	NaN	NaN	NaN	96	0.07508	0.26174	0.24549	138.02536
AGR	BA-2	Unknown	143	1	7.21479	0.00863	NaN	NaN	NaN	NaN	NaN	NaN	96	0.078	0.26174	0.24549	138.02536
AGR	CX-1	Unknown	277	1	NaN	NaN	NaN	NaN	NaN	NaN	NaN	NaN	96	NaN	0.26174	0.24549	138.02536
AGR	DD-2	Unknown	300	1	9.40921	0.00286	NaN	NaN	NaN	NaN	NaN	NaN	96	0.10173	0.26174	0.24549	138.02536
MGR	None			0	NaN	NaN	NaN	NaN	NaN	NaN	NaN	NaN	91	NaN	0.0017	5.26E-04	-4.03E+02
MGR	Q-1	Unknown	48	1	7.1749	0.00881	NaN	NaN	NaN	NaN	NaN	NaN	96	0.07236	0.0017	5.26E-04	-4.03E+02
MGR	X-2	Unknown	68	1	7.9956	0.00579	NaN	NaN	NaN	NaN	NaN	NaN	96	0.08063	0.0017	5.26E-04	-4.03E+02
MGR	AB-2	Unknown	78	1	NaN	NaN	NaN	NaN	NaN	NaN	NaN	NaN	96	NaN	0.0017	5.26E-04	-4.03E+02
MGR	AH-1	Unknown	92	1	7.91319	0.00604	NaN	NaN	NaN	NaN	NaN	NaN	96	0.0798	0.0017	5.26E-04	-4.03E+02
MGR	AH-2	Unknown	93	1	9.85359	0.0023	NaN	NaN	NaN	NaN	NaN	NaN	96	0.09937	0.0017	5.26E-04	-4.03E+02
MGR	BO-2	Unknown	177	1	10.92039	0.00137	NaN	NaN	NaN	NaN	NaN	NaN	96	0.11013	0.0017	5.26E-04	-4.03E+02
MGR	CN-3	Unknown	240	1	10.73664	0.0015	NaN	NaN	NaN	NaN	NaN	NaN	96	0.10828	0.0017	5.26E-04	-4.03E+02
MGR	CN-5	Unknown	242	1	8.62059	0.00423	NaN	NaN	NaN	NaN	NaN	NaN	96	0.08694	0.0017	5.26E-04	-4.03E+02
MGR	CX-1	Unknown	277	1	NaN	NaN	NaN	NaN	NaN	NaN	NaN	NaN	96	NaN	0.0017	5.26E-04	-4.03E+02
